# Supplementary material for: Iron-dependent apoptosis causes embryotoxicity in inflamed and obese pregnancy
Source: PubMed Central journal article supplement (PMC8242011; doi:10.1038/s41467-021-24333-z), 2021-06-29
Supplement: 41467_2021_24333_MOESM1_ESM.pdf [file 41467_2021_24333_MOESM1_ESM.pdf]

SUPPLEMENTARY INFORMATION

**Iron-dependent apoptosis causes embryotoxicity in inflamed and obese pregnancy**

Allison L Fisher, Veena Sangkhae, Kamila Balušíková, Nicolaos J Palaskas, Tomas Ganz, Elizabeta Nemeth

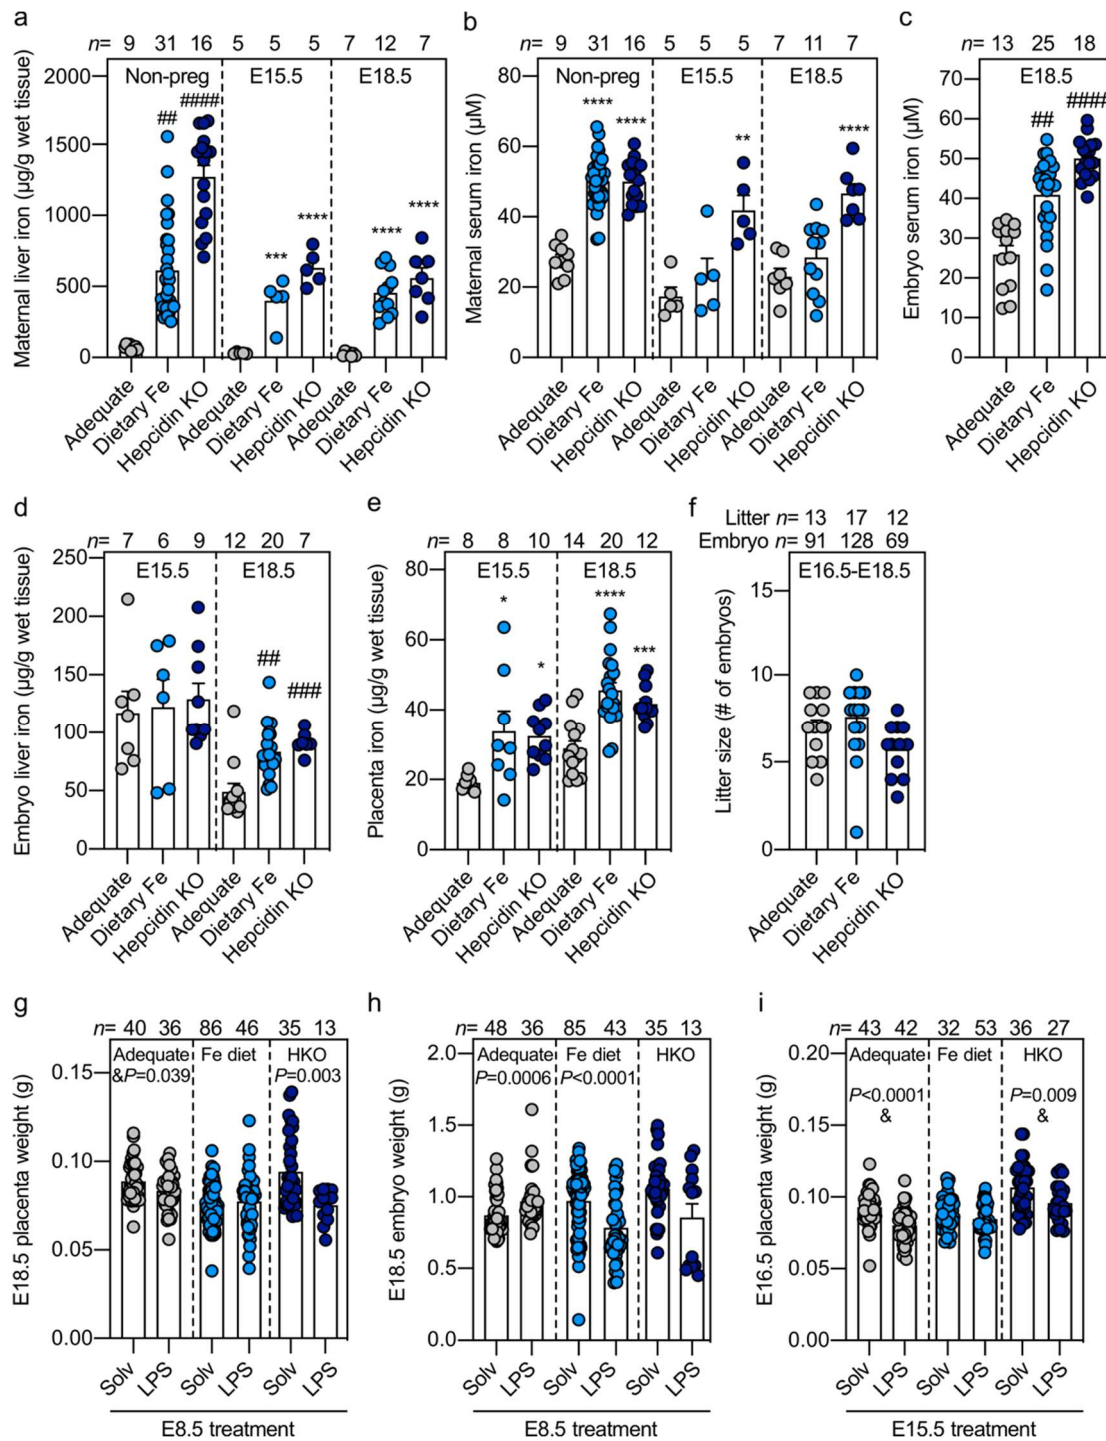

**Supplementary Figure 1. Maternal, placental, and embryo iron status in dietary and genetic iron overload during pregnancy.** Iron-adequate mice were maintained on standard chow (185 ppm iron). Dietary iron-loaded dams were fed a high iron diet (2,500-5,000 ppm iron) for 1-3 weeks prior to mating and during pregnancy. Genetic iron-loading model were hepcidin-1 KO dams fed standard chow. Non-pregnant females received the same iron treatment and were age-matched to pregnant dams. Pregnant iron-loaded dams were analyzed at E15.5 and E18.5 and compared to iron-adequate controls. **(a-b)** Maternal non-heme iron measurements in liver and serum. **(c-d)** Embryo non-heme iron measurements in serum and liver from randomly selected embryos. Embryo serum was not analyzed at E15.5 due to insufficient volume for analysis. **(e)** Placenta non-heme iron concentrations from randomly selected placentas. **(f)** Litter size from iron-adequate and iron-loaded dams (# of embryos counted in E16.5-E18.5 pregnancies). **(g-i)** Maternal systemic inflammation was induced by a single subcutaneous injection of 0.5  $\mu\text{g/g}$  LPS in the interscapular area either on E8.5 or E15.5. Weights of E18.5 **(g)** placentas or **(h)** embryos after maternal LPS treatment on E8.5. **(i)** E16.5 placenta weights after maternal E15.5

LPS treatment. **(g-i)** Embryo weights represent healthy and malformed embryos but exclude resorbing embryos in which weights were not accurately obtained. Error bars represent mean  $\pm$  s.e.m. Statistical differences between groups were determined by two-tailed Mann-Whitney  $U$ , two-tailed Student's  $t$ -test (denoted by &), one-way ANOVA for normally distributed values followed by Holm-Sidak method for multiple comparisons versus iron-adequate group (denoted by \* $P$ <0.05, \*\* $P$ <0.01, \*\*\* $P$ <0.001, \*\*\*\* $P$ <0.0001), or one-way ANOVA on ranks followed by Dunn's method for multiple comparisons versus iron-adequate group (denoted by # $P$ <0.05, ## $P$ <0.01, ### $P$ <0.001, #### $P$ <0.0001). Animal numbers and  $P$ -values are indicated in each panel. Source data are provided as a Source Data file.

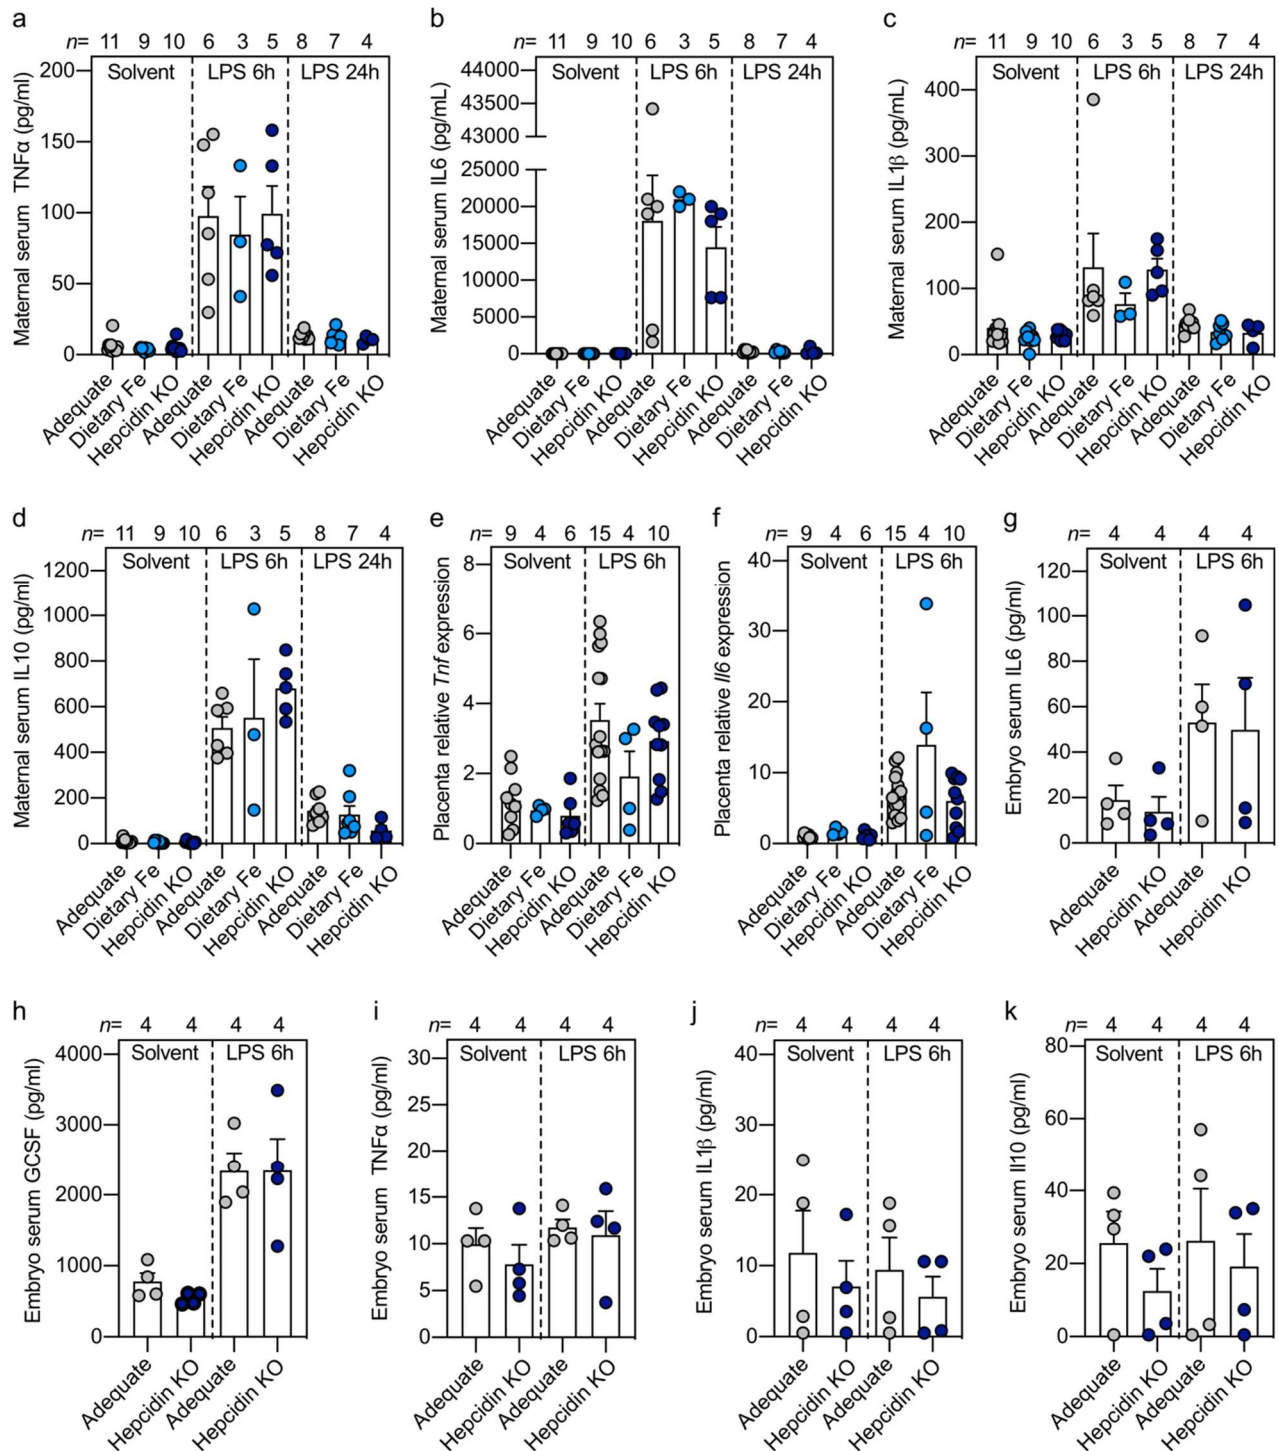

**Supplementary Figure 2. Maternal, placental, and embryo inflammation in dietary and genetic iron overload during pregnancy.** Iron-adequate mice were maintained on standard chow (185 ppm iron). Dietary iron-loaded dams were fed a high iron diet (2,500-5,000 ppm iron) for 1-3 weeks prior to mating and during pregnancy. Genetic iron-loading model were hepcidin-1 KO dams fed standard chow. **(a-d)** Cytokines TNF $\alpha$ , IL6, IL1 $\beta$ , and IL10 in maternal serum 6 and 24 hours after maternal LPS treatment on E15.5. **(e-f)** Placenta mRNA expression of *Tnf* and *Il6* normalized to *Rpl4* 6 hours after maternal LPS injection on E15.5. **(g-k)** Embryo serum IL6, GCSF, TNF $\alpha$ , IL1 $\beta$ , and IL10 6 h after maternal LPS treatment on E17.5, in a separate cohort where embryo blood was pooled from each litter to obtain sufficient serum for analysis. Error bars represent mean  $\pm$  s.e.m. Animal numbers are indicated in each panel. Source data are provided as a Source Data file.

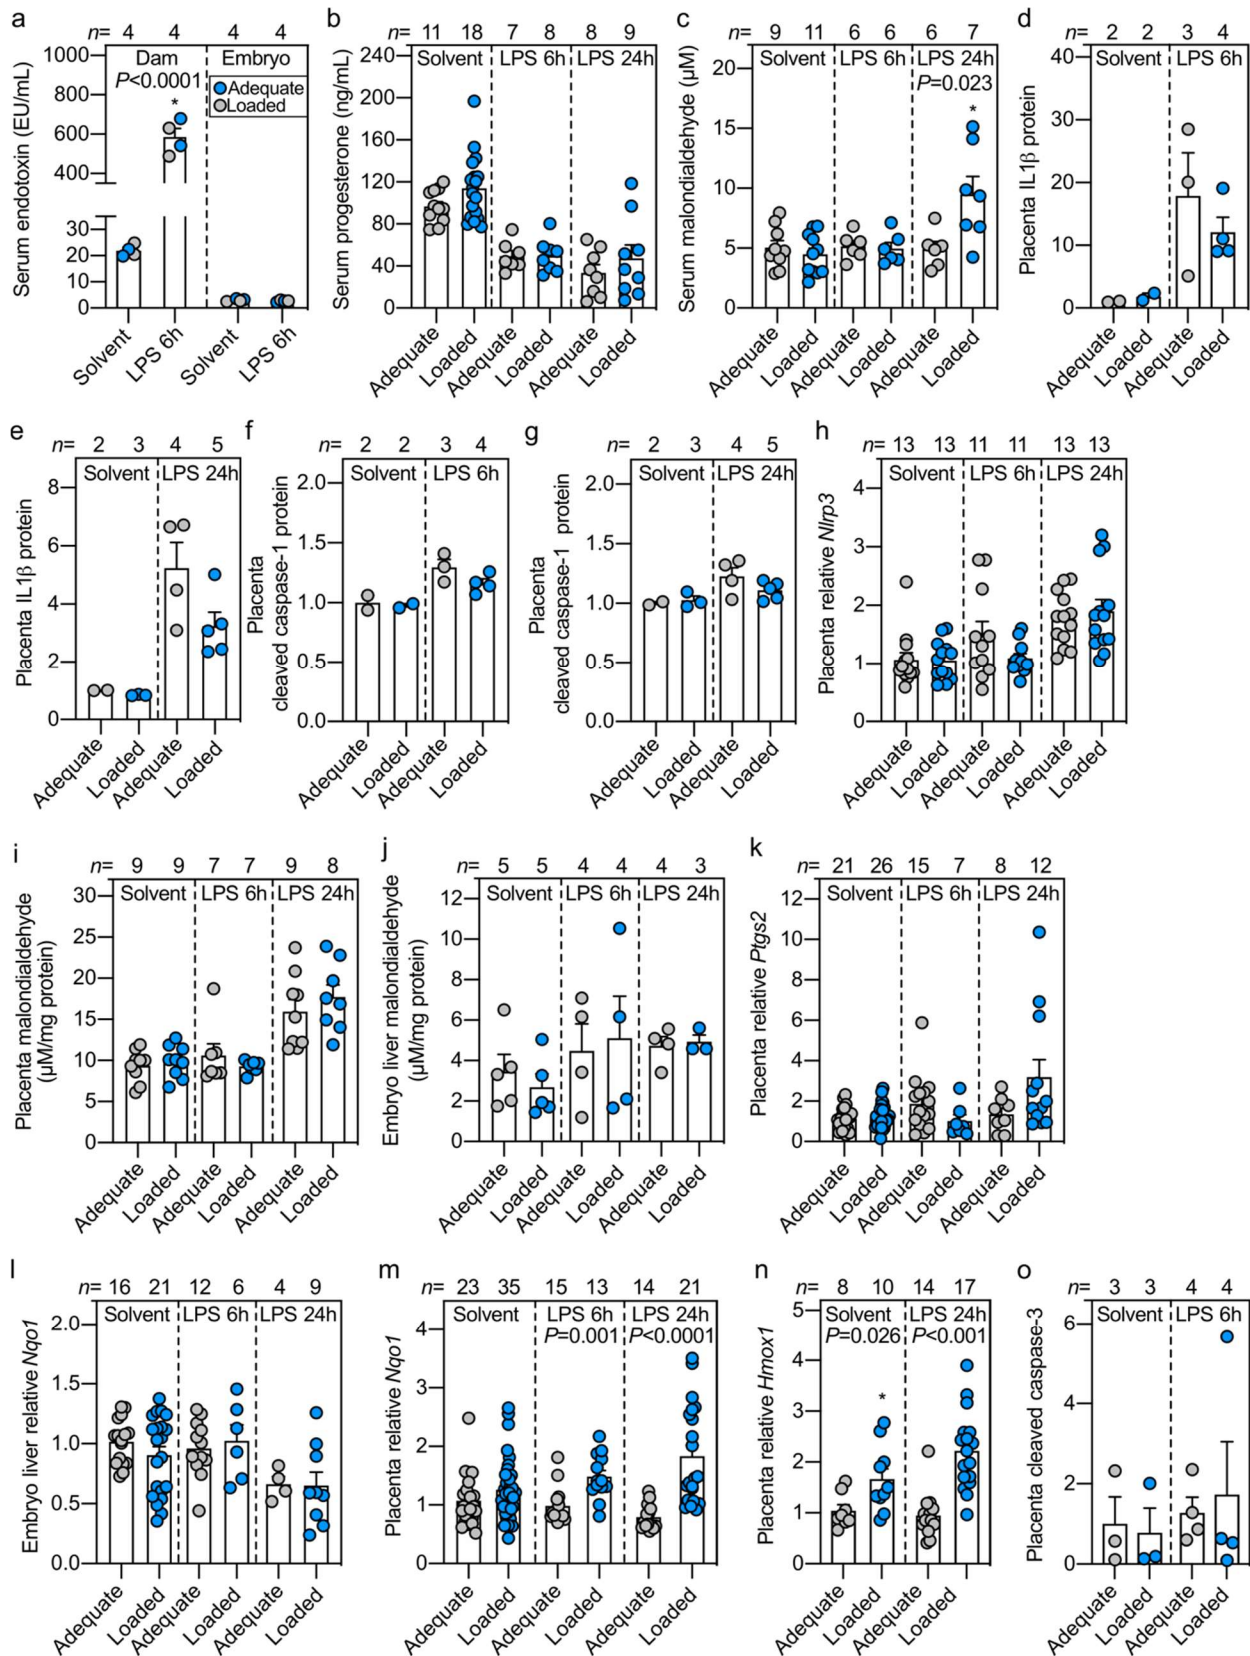

**Supplementary Figure 3. Comparison of cell death markers and mediators induced by LPS in placentas and embryos from iron-adequate and iron-loaded pregnancies. (a)** Endotoxin in maternal serum and in pooled embryo serum after maternal subcutaneous LPS injection (0.5  $\mu\text{g/g}$ ) on E17.5 for 6 hours. **(b-n)** Iron-adequate and iron-loaded dams were treated with subcutaneous LPS (0.5  $\mu\text{g/g}$ ) on E15.5 for 6 and 24 hours. **(b)** Maternal serum progesterone and **(c)** serum malondialdehyde. **(d-g)** Quantification of IL-1 $\beta$  and cleaved

caspase-1 by Western blot in whole placenta lysates. **(h)** Placental *Nlrp3* mRNA expression. **(i-j)** Malondialdehyde measurements in placenta and embryo livers. **(k)** Placental *Ptgs2* mRNA expression. **(l-m)** Embryo liver and placenta *Nqo1* mRNA expression. **(n)** Placenta *Hmox1* mRNA expression. **(o)** Quantification of cleaved caspase-3 by Western blot in whole placenta lysates after maternal LPS injection for 6 hours. **(d-o)** Embryo and placenta samples were randomly selected for analysis. Error bars represent mean  $\pm$  s.e.m. Statistical differences between groups were determined by two-tailed Mann-Whitney *U* for non-normally distributed values or two-tailed Student's *t*-test for normally distributed values (denoted by \*). *P* values and animal numbers are indicated in each panel. Source data are provided as a Source Data file.

**a**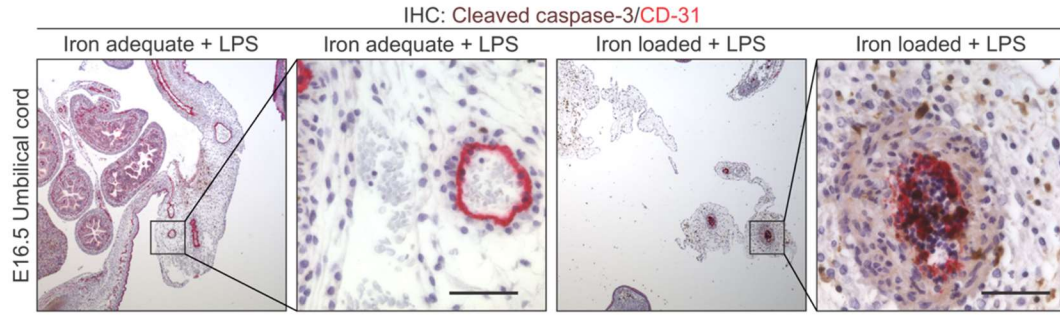**b**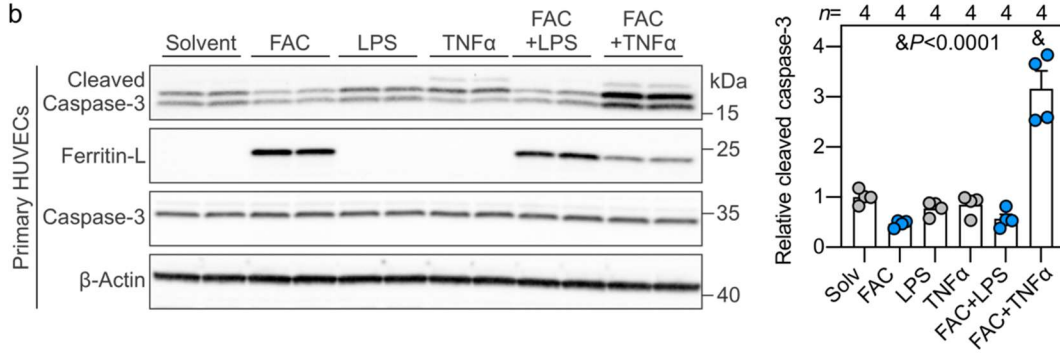**c**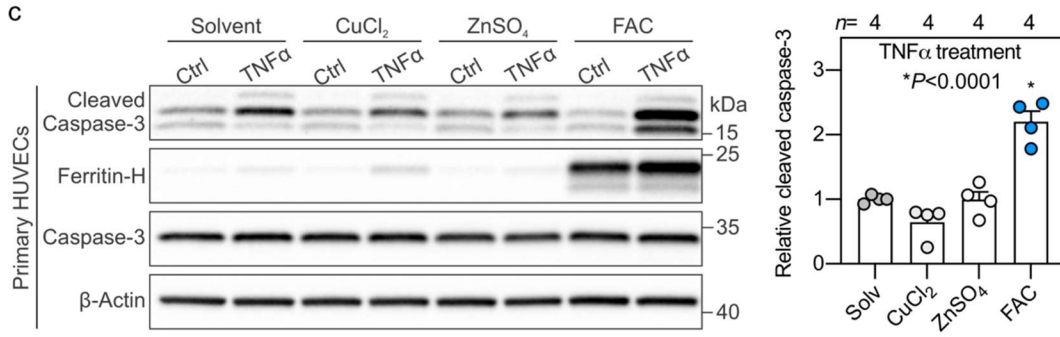**d**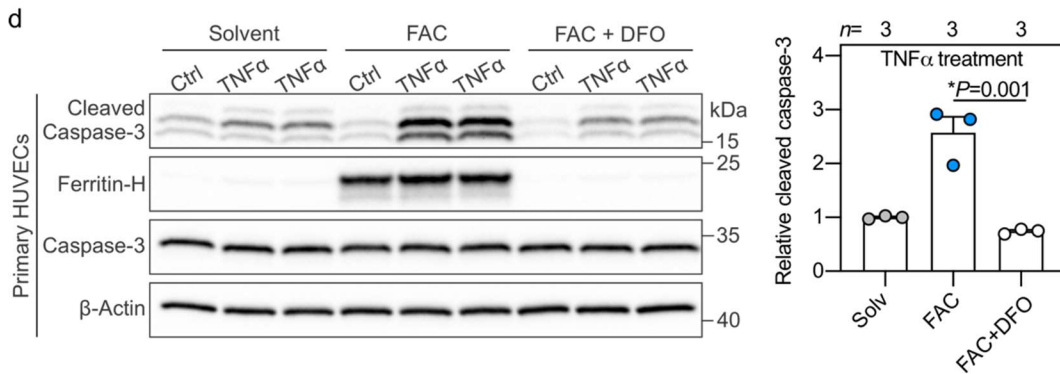**e**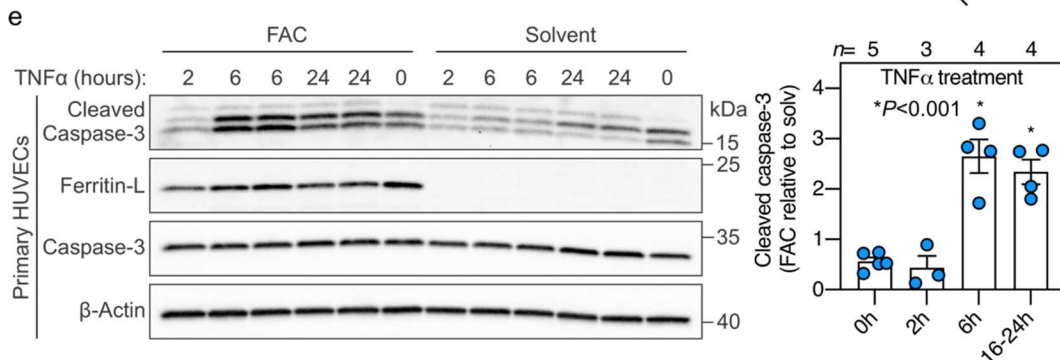

**Supplementary Figure 4. Potentiation of TNF $\alpha$ -induced apoptosis is specific to iron. (a)** Immunohistochemistry of paraffin-embedded mouse umbilical cords for cleaved caspase-3 (brown) and CD31 (red) after iron-adequate and iron-loaded dams were treated with LPS on E15.5 for 24 hours ( $n=1$  section/group). Scale bar= 50  $\mu\text{m}$ . **(b)** HUVECs were treated with solvent or 100  $\mu\text{M}$  ferric ammonium citrate (FAC) for 24 h and simulated with 2 mg/ml LPS or 50 ng/ml TNF $\alpha$  for 16 hours. Western blot (left) and quantitation (right) of cleaved caspase-3 normalized to  $\beta$ -actin ( $n=4$  independent experiments). **(c)** HUVECs were treated with solvent, 100  $\mu\text{M}$  FAC, 100  $\mu\text{M}$  copper chloride ( $\text{CuCl}_2$ ), or 100  $\mu\text{M}$  zinc sulfate ( $\text{ZnSO}_4$ ) and stimulated with 50 ng/ml TNF $\alpha$  for 16 hours. Western blot for cleaved caspase-3 (left) and quantitation of  $n=4$  independent experiments (right).  $\beta$ -actin was used as a loading control. **(d)** HUVECs were treated with 100  $\mu\text{M}$  FAC with and without 100  $\mu\text{M}$  iron chelator deferoxamine for 24 hours prior to stimulation with 50 ng/ml TNF $\alpha$  for 16 hours. Western blot for cleaved caspase-3 (left) and quantitation of  $n=3$  independent experiments (right).  $\beta$ -actin was used as a loading control. **(e)** HUVECs were treated with solvent or 100  $\mu\text{M}$  ferric ammonium citrate (FAC) for 24 hours and stimulated with 50 ng/ml TNF $\alpha$  for 0 ( $n=5$ ) 2 ( $n=3$ ), 6 ( $n=4$ ) and 24 hours ( $n=4$ ). Western blot (left) and quantitation (right) of cleaved caspase-3 normalized to  $\beta$ -actin ( $n=3-5$  replicates). **(b-e)** Error bars represent mean  $\pm$  s.e.m. Statistical differences between groups were determined by two-way ANOVA (denoted by &) or one-way ANOVA for normally distributed values with Holm-Sidak method for multiple comparisons versus solvent group (denoted by \*).  $P$  values and experimental replicates are indicated in each panel. Source data are provided as a Source Data file.



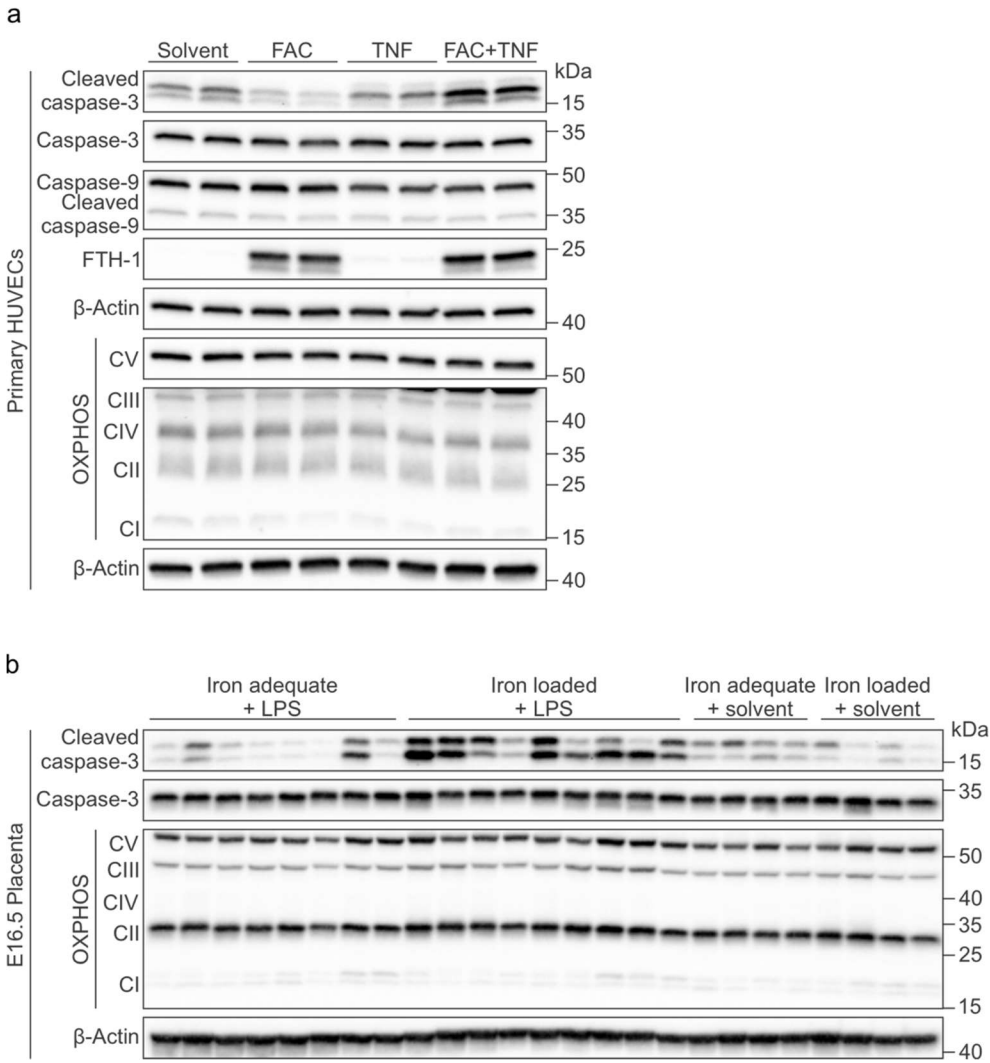

**Supplementary Figure 5. Comparison of the intrinsic and extrinsic pathways in iron-potentiated apoptosis. (a)** Primary HUVECs were treated with solvent or 100  $\mu$ M FAC for 24 hours prior to stimulation with 50 ng/ml TNF $\alpha$  for 16 hours. Western blot for cleaved caspase-3, -9, and mitochondrial complexes CI-CV (OXPHOS). Ferritin heavy chain (FTH1) is a marker of cellular iron loading. Representative image of  $n=3$  independent experiments. **(b)** Iron-adequate and iron-loaded dams were treated with solvent (both  $n=4$ ) or LPS (iron adequate  $n=8$ , iron loaded  $n=9$ ) on E15.5 for 24 hours. Placentas were randomly selected for analysis. Western blot for cleaved caspase-3 and mitochondrial OXPHOS complexes CI-CV.  $\beta$ -actin was used as a loading control. Source data are provided as a Source Data file.

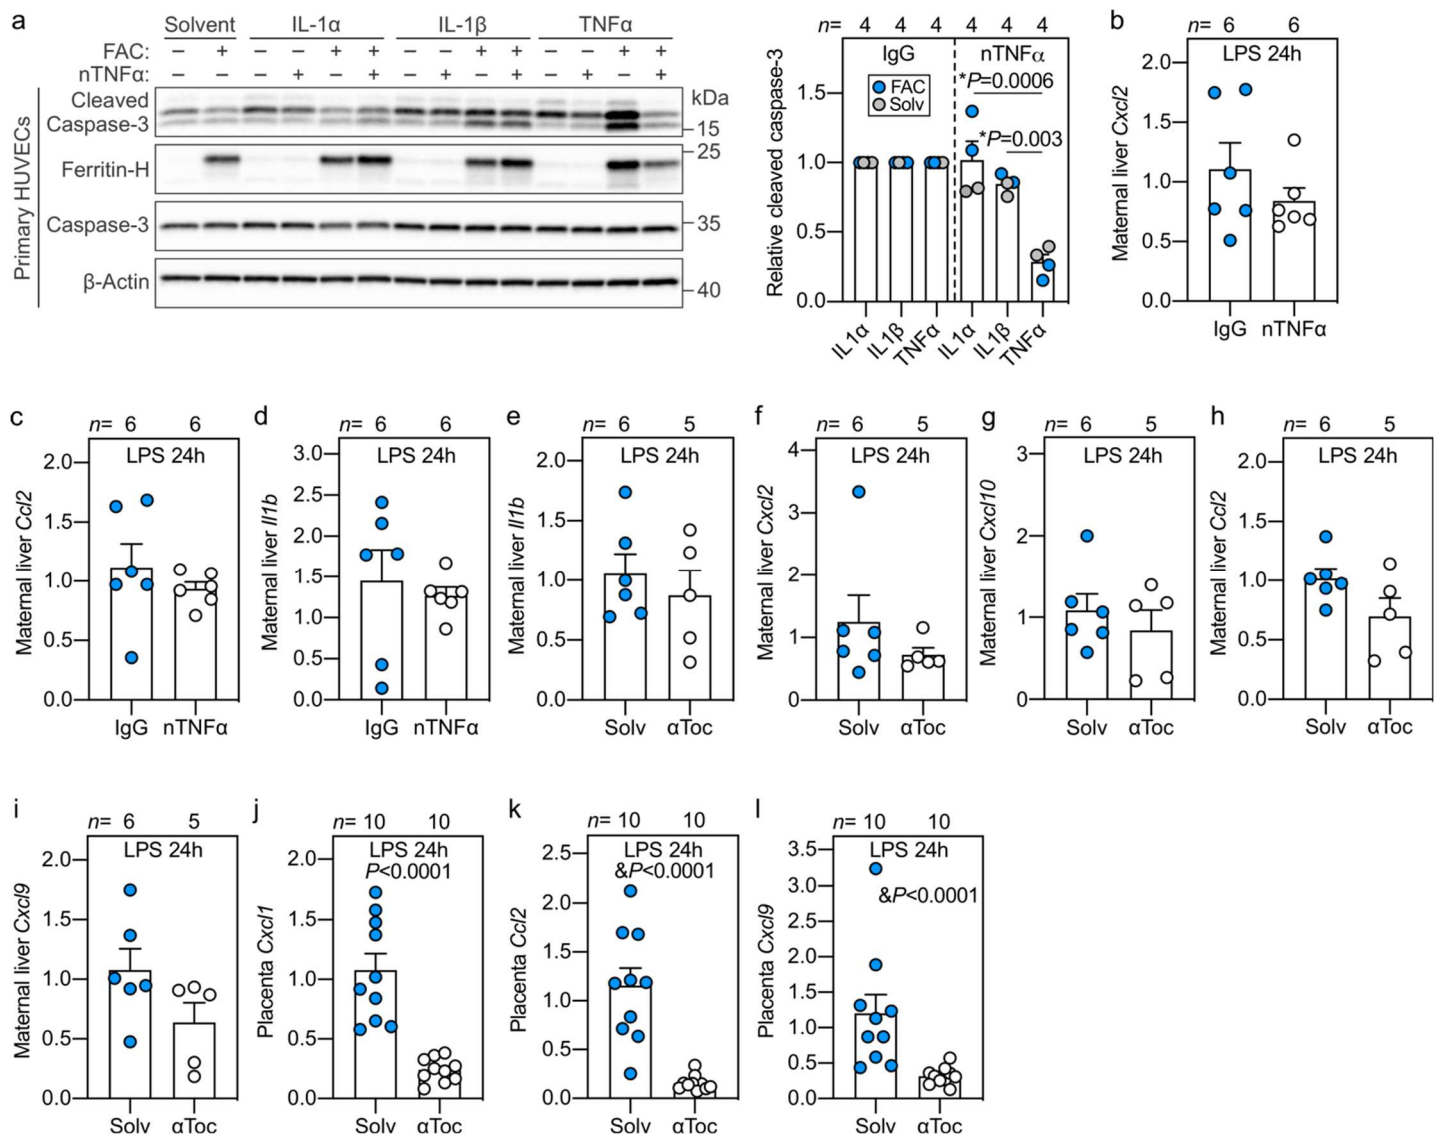

**Supplementary Figure 6. Maternal pretreatment with neutralizing TNF $\alpha$  antibody or  $\alpha$ Tocopherol does not attenuate LPS-induced maternal inflammation.** (a) The specificity of TNF $\alpha$  neutralizing antibody was tested in control and 100  $\mu$ M ferric ammonium citrate (FAC)-loaded HUVECs treated with 50 ng/ml of IL-1 $\alpha$ , IL-1 $\beta$ , or TNF $\alpha$  with and without 1  $\mu$ g neutralizing TNF $\alpha$  antibody (nTNF $\alpha$ ). Western blot for cleaved caspase-3 (left) and quantitation of  $n=4$  independent experiments.  $\beta$ -actin was used as a loading control. (b-d) Hepcidin KO dams were treated intravenously via the retroorbital sinus with 500  $\mu$ g TNF $\alpha$  neutralizing antibody (nTNF) or isotype control IgG antibody targeting trinitrophenol on E14.5, 15 hours prior to subcutaneous LPS injection (0.5  $\mu$ g/g) on E15.5 for 24 hours. Inflammatory genes were measured by qRT-PCR in maternal liver: (b) *Cxcl2*, (c) *Ccl2*, and (d) *Il1b*. (e-l) Hepcidin KO dams were treated with subcutaneous  $\alpha$ Tocopherol (vitamin E, 100  $\mu$ g/g) 14 and 2 hours prior to LPS injection on E15.5 for 24 hours. Inflammatory genes in maternal liver: (e) *Il1b*, (f) *Cxcl2*, (g) *Cxcl10*, (h) *Ccl2*, and (i) *Cxcl9*; (j-l) placental mRNA expression of *Cxcl1*, *Ccl2*, and *Cxcl9*. Placenta samples were randomly selected from each litter. Error bars represent mean  $\pm$  s.e.m. (a-l). Differences between groups was determined by two-tailed Student's *t*-test for normally distributed values, two-tailed Mann-Whitney *U* for non-normally distributed values (denoted by &), or one-way ANOVA for normally distributed values followed by Holm-Sidak method for multiple comparisons versus control group (denoted by \*). *P* values, experimental replicates, and animal numbers are indicated in each panel. Source data are provided as a Source Data file.

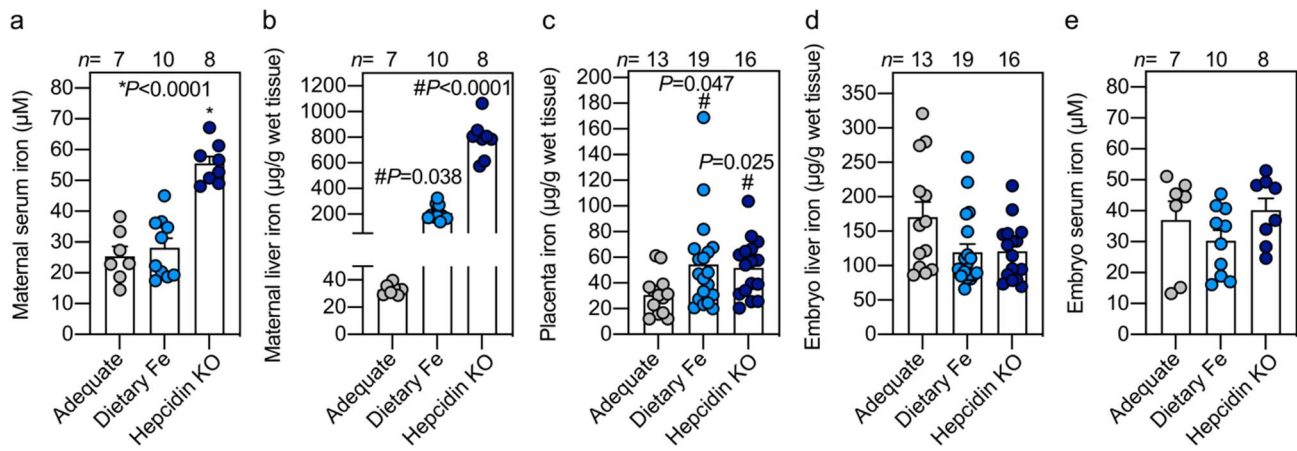

**Supplementary Figure 7. Iron parameters in iron-adequate, dietary iron supplemented, and hepcidin KO obese mice.** To induce obesity, wild-type C57BL/6 or hepcidin KO mice were fed a Western diet (100 ppm iron) starting at 3 weeks of age. Dietary iron-loaded dams were fed a Western diet supplemented with 3,700 ppm carbonyl iron for 1 week prior to mating and for the duration of pregnancy. Iron-loaded dams were analyzed at E18.5 and compared to iron-adequate controls. **(a)** Maternal serum iron and **(b)** liver iron concentrations. Iron measurements at E18.5: **(c)** placenta, **(d)** embryo liver iron, and **(e)** embryo serum iron. Embryo and placenta samples were randomly selected from each litter. Error bars represent mean  $\pm$  s.e.m. Statistical differences between groups were determined by one-way ANOVA for normally distributed values followed by Holm-Sidak method for multiple comparisons versus adequate group (denoted by \*) or one-way ANOVA on ranks followed by Dunn's method for multiple comparisons versus adequate group (denoted by #). *P* values and animal numbers are indicated in each panel. Source data are provided as a Source Data file.

| Supplementary Table 1. Interaction of maternal iron excess and PAMPs in pregnancy |                            |        |                |                    |               |                                   |                   |             |                                   |                   |
|-----------------------------------------------------------------------------------|----------------------------|--------|----------------|--------------------|---------------|-----------------------------------|-------------------|-------------|-----------------------------------|-------------------|
| PAMP                                                                              | Mimetic                    | TLR    | Dose/<br>Route | GD/<br>time        | Iron adequate |                                   |                   | Iron loaded |                                   |                   |
|                                                                                   |                            |        |                |                    | N             | Saa1 fold-<br>change<br>(Mean±SD) | Embryo<br>outcome | N           | Saa1 fold-<br>change<br>(Mean±SD) | Embryo<br>outcome |
| LPS <i>E. coli</i><br>O55:B5                                                      | Gram-negative<br>bacteria  | TLR4   | 0.5 µg/g SQ    | E15.5,<br>24 hours | 8             | 251 ± 92                          | Normal            | 4           | 284 ± 42                          | Adverse           |
| Poly I:C                                                                          | dsDNA virus                | TLR3   | 10 µg/g IV     | E15.5,<br>24 hours | 3             | 289 ± 123                         | Normal            | 5           | 197 ± 38                          | Normal            |
| LTA<br>( <i>S. aureus</i> )                                                       | Gram-positive<br>bacteria  | TLR2   | 20 µg/g IV     | E15.5,<br>24 hours | 3             | 227 ± 97                          | Normal            | 4           | 139 ± 33                          | Normal            |
| Pam3csk4                                                                          | Triacylated<br>lipopeptide | TLR1/2 | 100 µg SQ      | E15.5,<br>24 hours | 3             | 229 ± 72                          | Normal            | 4           | 330 ± 167                         | Normal            |
| Flagellin<br>( <i>B. subtilis</i> )                                               | Flagellin                  | TLR5   | 30 µg SQ       | E15.5,<br>24 hours | 3             | 76 ± 46                           | Normal            | 3           | 33 ± 19                           | Normal            |

**Supplementary Table 1. Interaction of maternal iron excess and PAMPs in pregnancy.** Pregnant iron-adequate WT dams and iron-loaded hepcidin KO dams were treated with the indicated PAMPs on E15.5 to evaluate the interaction of maternal iron excess with inflammatory pathways triggered by a broader spectrum of pathogen-derived molecules from viruses and bacteria. PAMP= pathogen associated molecular patter, LPS= lipopolysaccharide, Poly I:C= polyinosinic:polycytidylic acid, LTA= lipoteichoic acid. TLR= toll like receptor. SQ= subcutaneous, IV=intravenous, GD= gestational day, Saa1= serum amyloid A1. Source data are provided as a Source Data file.

| <b>Supplementary Table 2. Antibodies</b>                                      |                                                                      |
|-------------------------------------------------------------------------------|----------------------------------------------------------------------|
| <b>Target protein</b>                                                         | <b>Primary antibody</b>                                              |
| Mouse and human cleaved caspase-3                                             | Rabbit monoclonal antibody 9664, Cell Signaling Technology, 1:1,000  |
| Mouse and human total caspase-3                                               | Rabbit polyclonal antibody 9662, Cell Signaling Technology, 1:5,000  |
| Mouse and human ferritin heavy chain                                          | Rabbit monoclonal antibody 4393, Cell Signaling Technology, 1:25,000 |
| Mouse and human ferritin light chain                                          | Goat polyclonal NBP1-06986, Novus Biologicals, 1:5,000               |
| Mouse and human $\beta$ -actin                                                | Monoclonal antibody-peroxidase A3854, Sigma, 1:50,000                |
| Mouse IL-1 beta /IL-1F2                                                       | Goat polyclonal antibody AF401, R&D Systems, 1:1,000                 |
| Mouse cleaved caspase-1                                                       | Rabbit monoclonal antibody 89332, Cell Signaling Technology, 1:3,000 |
| Human caspase-9                                                               | Mouse monoclonal antibody 9508, Cell Signaling Technology. 1:1,000   |
| Mouse and human electron transport chain                                      | Total OXPHOS Rodent WB Antibody Cocktail ab110413, Abcam, 1:5,000    |
| Mouse CD31/PECAM-1                                                            | Goat polyclonal antibody AF3628, Novus Biologicals, 1:1,000          |
| <b>Secondary antibodies:</b>                                                  |                                                                      |
| Anti-mouse IgG HRP antibody 7076, Cell Signaling Technology, 1:5,000          |                                                                      |
| Anti-rabbit IgG HRP antibody 7074, Cell Signaling Technology, 1:5,000         |                                                                      |
| Anti-goat IgG HRP antibody 2354, Santa Cruz, 1:5,000                          |                                                                      |
| ImmPRESS horse anti-rabbit IgG HRP detection kit MP-7401, Vector Laboratories |                                                                      |
| ImmPRESS horse anti-goat IgG AP detection kit MP-5405, Vector Laboratories    |                                                                      |
| <b>Neutralizing antibodies:</b>                                               |                                                                      |
| Human TNF $\alpha$ neutralizing                                               | Rabbit monoclonal antibody 7321, Cell Signaling Technology           |
| Mouse TNF $\alpha$ neutralizing                                               | Rat monoclonal antibody clone XT3.11, BioXcell                       |
| Rat IgG isotype control, anti-trinitrophenol                                  | Rat monoclonal antibody clone TNP6A7, BioXcell                       |

**Supplementary Table 2. Antibodies.**

| <b>Supplementary Table 3. List of qPCR primers.</b> |                                                                                                      |
|-----------------------------------------------------|------------------------------------------------------------------------------------------------------|
| <b>Gene</b>                                         | <b>Sequence</b>                                                                                      |
| Mouse <i>Tnf</i>                                    | Forward: 5'- AAT GGC CTC CCT CTC ATC AG -3'<br>Reverse: 5'- GCT ACG ACG TGG GCT ACA GG -3'           |
| Mouse <i>Il6</i>                                    | Forward: 5'- CTC TGC AAG AGA CTT CCA TCC AGT -3'<br>Reverse: 5'- CGT GGT TGT CAC CAG CAT CA -3'      |
| Mouse <i>Cxcl9</i>                                  | Forward: 5'- GCC ATG AAG TCC GCT GTT CT -3'<br>Reverse: 5'- TAG GGT TCC TCG AAC TCC ACA -3'          |
| Mouse <i>Il1b</i>                                   | Forward: 5'- AAG GAG AAC CAA GCA ACG ACA AAA -3'<br>Reverse: 5'- TGG GGA ACT CTG CAG ACT CAA ACT -3' |
| Mouse <i>Nqo1</i>                                   | Forward: 5'- CAC GGG GAC ATG AAC GTC AT -3'<br>Reverse: 5'- GGA GTG TGG CCA ATG CTG TA -3'           |
| Mouse <i>Nlrp3</i>                                  | Forward: 5'- AAA ATG CCT TGG GAG ACT CA -3'<br>Reverse: 5'- AAG TAA GGC CGG AAT TCA CC -3'           |
| Mouse <i>Ptgs2</i>                                  | Forward: 5'- TGA GTA CCG CAA ACG CTT CT -3'<br>Reverse: 5'- CAG CCA TTT CCT TCT CTC CTG T -3'        |
| Mouse <i>Saa1</i>                                   | Forward: 5'- AGT CTG GGC TGC TGA GAA AA -3'<br>Reverse: 5'- ATG TCT GTT GGC TTC CTG GT -3'           |
| Mouse <i>Ccl2</i>                                   | Forward: 5'- AGG TCC CTG TCA TGC TCC TG -3'<br>Reverse: 5'- TCA TTG GGA TCA TCT TGC TG -3'           |
| Mouse <i>Cxcl2</i>                                  | Forward: 5'- GAA GTC ATA GCC ACT CTC AAG G -3'<br>Reverse: 5'- CCT CCT TTC CAG GTC AGT TAG C -3'     |
| Mouse <i>Cxcl10</i>                                 | Forward: 5'- CCA CGT GTT GAG ATC ATT GCC -3'<br>Reverse: 5'- TCA CTC CAG TTA AGG AGC CC -3'          |
| Mouse <i>Cxcl1</i>                                  | Forward: 5'- AGA CCA TGG CTG GGA TTC AC -3'<br>Reverse: 5'- AGT GTG GCT ATG ACT TCG GT -3'           |
| Mouse <i>Cd31</i>                                   | Forward: 5'- CAG GAC CAC GTG TTA GTG TT -3'<br>Reverse: 5'- ACT CCT GAT GGG TTC TGA CT -3'           |
| Mouse <i>Tfrc</i>                                   | Forward: 5'- TCA TGA GGG AAA TCA ATG AT -3'<br>Reverse: 5'- GCC CCA GAA GAT ATG TCG GAA -3'          |
| Mouse <i>Hmox1</i>                                  | Forward: 5'- CCT CAC AGA TGG CGT CAC TT -3'<br>Reverse: 5'- TCT GCA GGG GCA GTA TCT TG -3'           |
| Mouse <i>Hprt</i>                                   | Forward: 5'- CTG GTT AAG CAG TAC AGC CCC AA -3'<br>Reverse: 5'- CAG GAG GTC CTT TTC ACC AGC -3'      |
| Mouse <i>Rpl4</i>                                   | Forward: 5'- TGA AAA GCC CAG AAA TCC AA -3'<br>Reverse: 5'- AGT CTT GGC GTA AGG GTT CA -3'           |
| Human <i>HPRT</i>                                   | Forward: 5'- GCC CTG GCG TCG TG ATTA GT -3'<br>Reverse: 5'- AGC AAG ACG TTC AGT CCT GTC -3'          |
| Human <i>NQO1</i>                                   | Forward: 5'- GCT GGT TTG AGC GAG TGT TC -3'<br>Reverse: 5'- CTG CCT TCT TAC TCC GGA AGG -3'          |
| Human <i>HMOX1</i>                                  | Forward: 5'- ACC TTC CCC AAC ATT GCC AG -3'<br>Reverse: 5'- CAA CTC CTC AAA GAG CTG GAT -3'          |
| Human <i>TFRC</i>                                   | Forward: 5'- AGT TGA ACA AAG TGG CAC GAG -3'<br>Reverse: 5'- AGC AGT TGG CTG TTG TAC CTC -3'         |

**Supplementary Table 3. List of qPCR primers.**
